# Supplementary material for: Computational Systems Analysis of Dopamine Metabolism
Source: PLoS One. 2008 Jun 18;3(6):e2444. doi: 10.1371/journal.pone.0002444 (PMC2435046; doi:10.1371/journal.pone.0002444)
Supplement: Table S1 — Metabolite concentrations and fluxes at steady state (relative units) (0.06 MB DOC) [file pone.0002444.s002.doc]

**Table S1. Metabolite concentrations and fluxes at steady state** (relative units)

| **Variable** | Metabolite | **Abbrevation** | **Concentration** | **Flux** |
| --- | --- | --- | --- | --- |
| *X*1 | Tyrosine | Tyr | 5000 | 1000 |
| ***X*11** | Dihydrobiopterin | BH2 | 10 | 950 |
| ***X*12** | Tyramine |  | 30 | 10 |
| ***X*2** | L-DOPA | DOPA | 100 | 983.838 |
| ***X*14** | Dopaquinone | DOPA-Q | 5 | 69.192 |
| ***X*35** | Pyrrolo-quinoline quinine | PQQ | 20 | 40.823 |
| ***X*3** | Dopamine | DA-i | 700 | 2624.020 |
| ***X*32** | Dopamine (in vesicles) | DA-v | 53900 | 2099.210 |
| ***X*33** | Dopamine (extracellular) | DA-e | 400 | 2099.210 |
| ***X*16** | 3-Methoxytyramine | 3-MT | 20 | 209.921 |
| ***X*17** | DOPAL (extracellular) | DOPAL-e | 10 | 209.921 |
| ***X*26** | DOPAC (extracellular) | DOPAC-e | 100 | 209.921 |
| ***X*27** | Homovanillate | HVA | 150 | 377.859 |
| ***X*20** | S-Adenosyl-L-homocysteine |  | 5 | 377.859 |
| ***X*42** | Prostaglandin H2 | PGH2 | 5 | 2.624 |
| ***X*30** | Dopamine Quinone | DA-Q | 10 | 44.608 |
| ***X*34** | Dopamine Chrome |  | 10 | 40.148 |
| ***X*36** | 2-Carboxy-2,3-dihydro-5,6-dihyroxyindole |  | 5 | 13.838 |
| ***X*40** | L-Dopachrome |  | 5 | 13.838 |
| ***X*37** | 5,6-Dihydroxyindole |  | 5 | 52.602 |
| ***X*38** | Indole-5,6-quinone |  | 5 | 52.602 |
| ***X*39** | 5,6-Dihydroxyindole-2-carboxylate | DHICA | 5 | 1.384 |
| ***X*4** | Melanin |  | 10 | 53.986 |
| ***X*23** | DOPAL |  | 5 | 472.323 |
| ***X*24** | DOPAC | DOPAC | 700 | 472.323 |
| ***X*28** | DOPAC Quinone | DOPAC-Q | 10 | 472.323 |
| ***X*70** | O2**-.** |  | 5 | 880.341 |
| ***X*71** | H2O2 |  | 5 | 982.075 |
| ***X*72** | H2O2 (extracellular) | H2O2-e | 2 | 419.843 |
| ***X*73** | HO**.** |  | 2 | 199.317 |
| ***X*76** | HO**.**---NO2**.** |  | 2 | 23.616 |
| ***X*77** | **.**NO2 |  | 2 | 47.232 |
| ***X*79** | Oxidized glutathione | GSSG | 100 | 292.550 |
| ***X*81** | Dehydroascorbate |  | 100 | 278.564 |
