# Supplementary material for: Computational Systems Analysis of Dopamine Metabolism
Source: PLoS One. 2008 Jun 18;3(6):e2444. doi: 10.1371/journal.pone.0002444 (PMC2435046; doi:10.1371/journal.pone.0002444)
Supplement: Table S2 — List of independent variables (include environmental factors and enzymes) (0.06 MB DOC) [file pone.0002444.s003.doc]

**Table S2.** List of independent variables (include environmental factors and enzymes)

| **Variable** | **Metabolite** | **Abbreviation** |
| --- | --- | --- |
| *X*10 | Tetrahydrobiopterin | BH4 |
| ***X*13** | L-Glutamate | Glu |
| ***X*18** | S-Adenosyl-L-methionine | SAM |
| ***X*41** | Prostaglandin G2 | PGG2 |
| ***X*74** | **.**NO | **NO** |
| ***X*78** | Glutathione | GSH |
| ***X*80** | Ascorbate | ASB |
| ***X*82** | N-acetylcysteine |  |
| ***X*83** | Fe2+ |  |
| ***X*84** | Fe3+ |  |
| ***X*85** | NADH |  |
| ***X*86** | NAD+ |  |
| ***X*87** | NADPH |  |
| ***X*88** | NADP+ |  |
| ***X*89** | VMAT2 |  |
| ***X*90** | DAT |  |
| ***X*91** | ATP |  |
| ***X*50** | tyrosine hydroxylase | TH |
| ***X*52** | tyrosinase | TYR |
| ***X*53** | prostaglandin G/H synthase |  |
| ***X*54** | xanthine oxidase | XO |
| ***X*55** | aldehyde dehydrogenase | ALDH |
| ***X*56** | monoamine oxidase | MAO |
| ***X*57** | semicarbazide-sensitive amine oxidase | SSAO |
| ***X*59** | DOPA decarboxylase | AADC |
| ***X*60** | dopachrome isomerase | DCT |
| ***X*61** | catalase | CAT |
| ***X*62** | superoxide dismutase | SOD |
| ***X*63** | aldehyde dehydrogenase (extracellular) | ALDH-e |
| ***X*64** | monoamine oxidase (extracellular) | MAO-e |
| ***X*65** | catechol O-methyltransferase | COMT |
| ***X*66** | glutathione peroxidase | GPx |
| ***X*67** | glutathione reductase |  |
| ***X*68** | semicarbazide-sensitive amine oxidase (extracellular) | SSAO-e |
| ***X*69** | migration inhibitory factor | MIF |
